# Supplementary material
Source: Springer Nature journal article supplement (https://www.springermedizin.de/resource/supplementary/12943_2010_721_MOESM3_ESM.pdf/9554656)

Day 16

Day 21

TM-

TM+

TM-

TM+

A

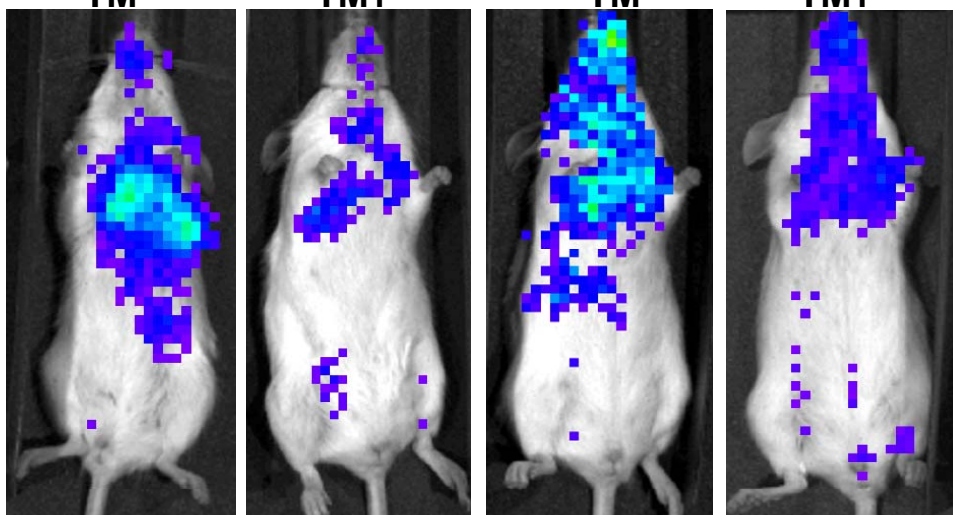

B

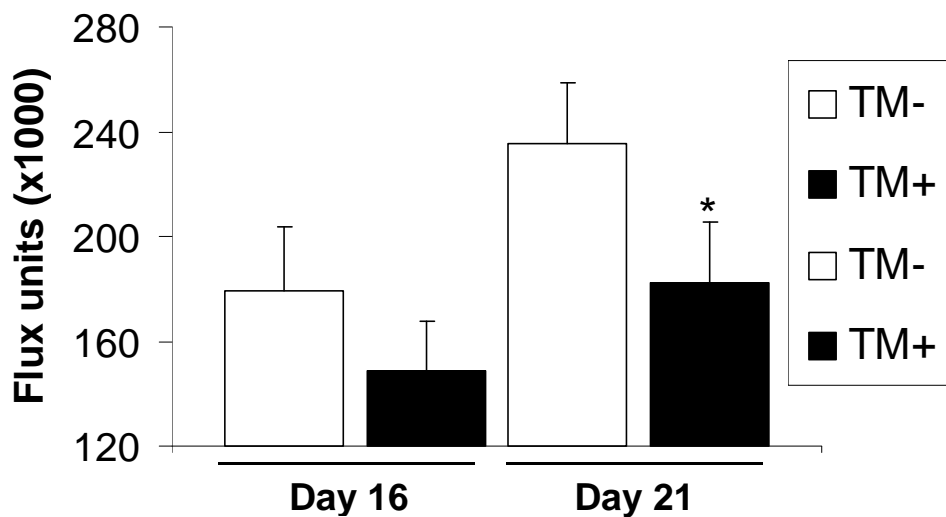

C

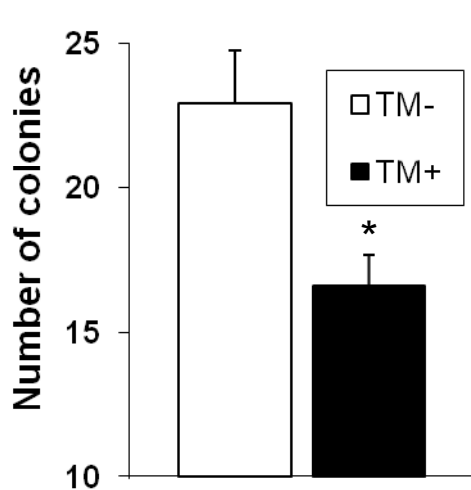

D

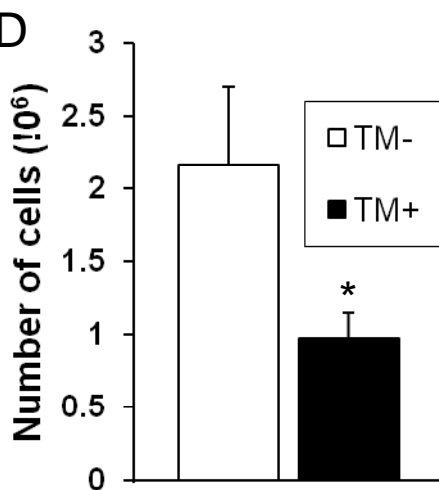

Supplement: MOESM3 [file 9554656]
